# Supplementary material for: Enhanced α-phase stability of formamidinium lead iodide with addition of 5-ammonium valeric acid chloride
Source: Royal Society of Chemistry journal article supplement (doi:10.1039/d4ya00527a), 2024-12-03
Supplement: d4ya00527a1.pdf [file d4ya00527a1.pdf]

## Supporting Information

### *Enhanced $\alpha$ -Phase Stability of Formamidinium Lead Iodide with Addition of 5-Ammonium Valeric Acid Chloride*

Yanan Li<sup>1,†</sup>, Abigale Bahnick<sup>1,†</sup>, Patrick J. Lohr<sup>1</sup>, Sean Raglow<sup>2</sup>, Adam D. Printz<sup>1,3,\*</sup>

<sup>†</sup>Equal Contributions

<sup>1</sup>Department of Chemical and Environmental Engineering, University of Arizona, Tucson, AZ 85721, USA

<sup>2</sup>Department of Physics, University of Arizona, Tucson, AZ 85721, USA

<sup>3</sup>Department of Materials Science and Engineering, University of Arizona, Tucson, AZ 85721, USA

\*Corresponding author:

Prof. Adam D. Printz

Department of Chemical and Environmental Engineering

Department of Materials Science and Engineering

University of Arizona, 1133 E James E Rogers Way, Tucson, AZ 85721

Phone: +1 520 626 6769

e-mail: [aprintz@arizona.edu](mailto:aprintz@arizona.edu)

**Table S1.** FWHM of XRD (100) peaks and intensity of XRD (100) and (111) peaks for FAPbI<sub>3</sub> films without and with additives.

| Additive   | (100) FWHM    | (100) Intensity    | (111) Intensity  | (111)/(100)   |
|------------|---------------|--------------------|------------------|---------------|
| None       | 0.248 ± 0.007 | 3631.33 ± 284.82   | 451.67 ± 52.78   | 0.124 ± 0.005 |
| 1% 5-AVAI  | 0.241 ± 0.002 | 3452.33 ± 567.95   | 493.00 ± 71.84   | 0.144 ± 0.021 |
| 2% 5-AVAI  | 0.153 ± 0.005 | 10220.00 ± 806.29  | 948.33 ± 29.57   | 0.093 ± 0.005 |
| 3% 5-AVAI  | 0.135 ± 0.002 | 12866.50 ± 348.60  | 1150.50 ± 122.33 | 0.089 ± 0.007 |
| 5% 5-AVAI  | 0.126 ± 0.004 | 19081.67 ± 1472.22 | 1254.00 ± 235.37 | 0.066 ± 0.012 |
| 1% 5-AVACl | 0.235 ± 0.005 | 3779.00 ± 122.43   | 556.33 ± 47.52   | 0.147 ± 0.010 |
| 2% 5-AVACl | 0.181 ± 0.016 | 7324.33 ± 319.25   | 1116.67 ± 51.05  | 0.153 ± 0.012 |
| 3% 5-AVACl | 0.154 ± 0.004 | 8390.67 ± 269.34   | 1380.67 ± 67.34  | 0.164 ± 0.003 |
| 5% 5-AVACl | 0.143 ± 0.002 | 8086.33 ± 424.46   | 1248.33 ± 66.12  | 0.154 ± 0.009 |

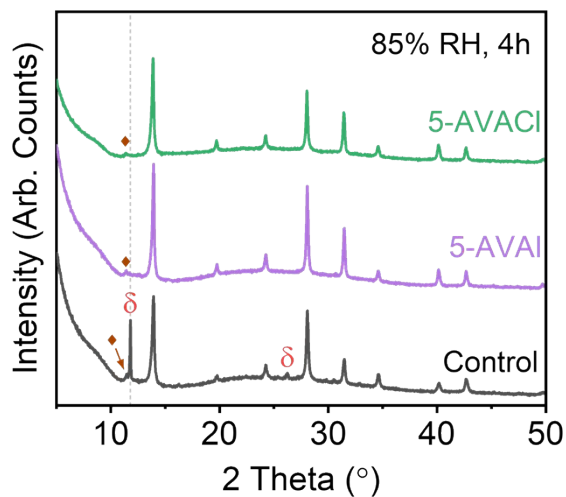

**Figure S1.** XRD patterns of the pristine FAPbI<sub>3</sub> film and the films prepared with 1 mol% of 5-AVAI and 5-AVACl after 4 h of aging under 85% RH and room temperature.

**Table S2.** Integrated FAPbI<sub>3</sub> (100) peak areas of fresh and aged samples for FAPbI<sub>3</sub> thin films with and without additives (at a concentration of 1 mol%).

|         | Fresh   | Aged    | Ratio of aged/fresh |
|---------|---------|---------|---------------------|
| None    | 2105.28 | 1527.34 | 0.7255              |
| 5-AVAI  | 1960.56 | 1698.79 | 0.8665              |
| 5-AVACl | 1856.77 | 1702.21 | 0.9168              |

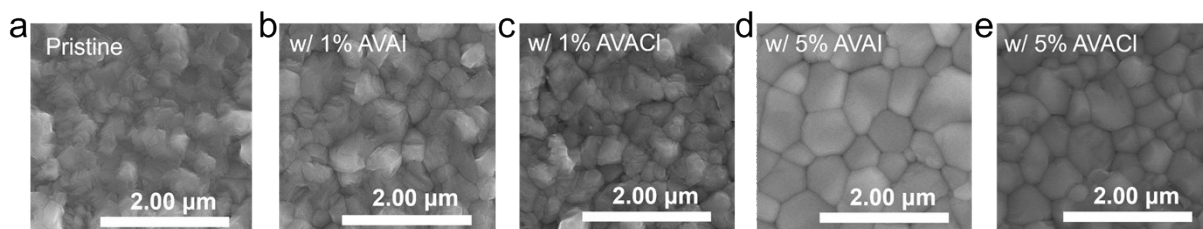

**Figure S2.** SEM micrographs of (a) pristine FAPbI<sub>3</sub> and additive-treated FAPbI<sub>3</sub> films with (b,c) 1 and (d,e) 5 mol% 5-AVAI or 5-AVACl.

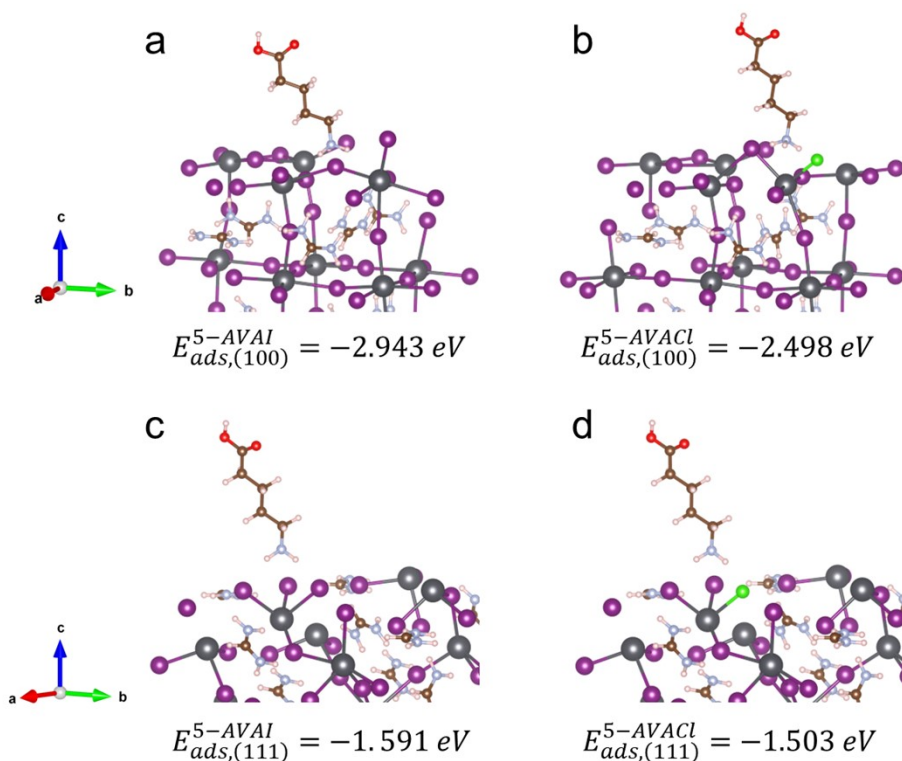

**Figure S3.** Final adsorption geometries for (a) 5-AVAI and (b) 5-AVACl on the (100) PbI<sub>2</sub> facet of FAPbI<sub>3</sub> (c) 5-AVAI and (d) 5-AVACl on the (111) PbI<sub>3</sub>FA facet of FAPbI<sub>3</sub>.

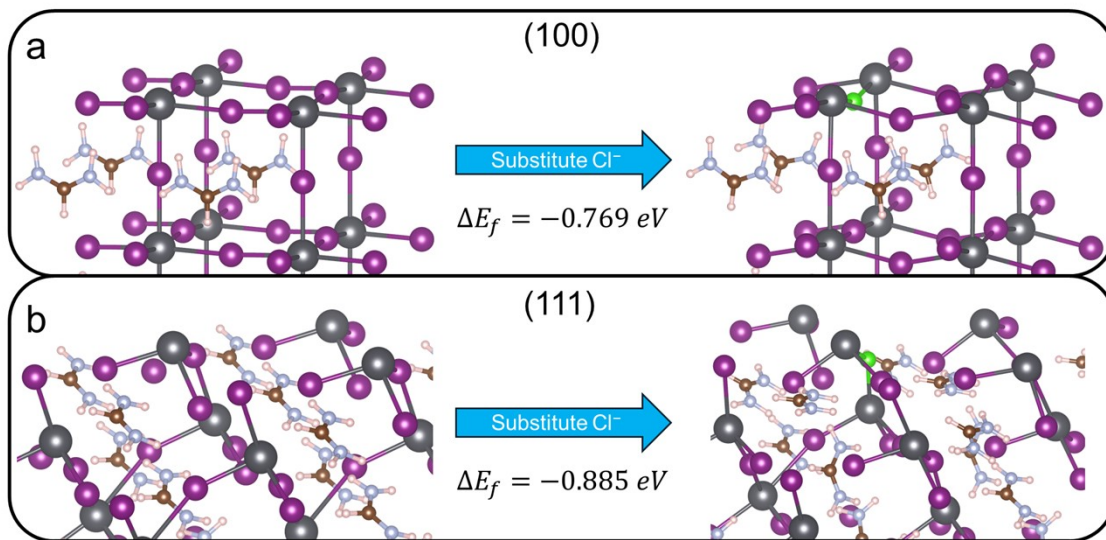

**Figure S4.** Formation energy change upon substitution of surface  $\text{I}^-$  with  $\text{Cl}^-$  on the (a) (100) and (b) (111) facet of  $\text{FAPbI}_3$ .

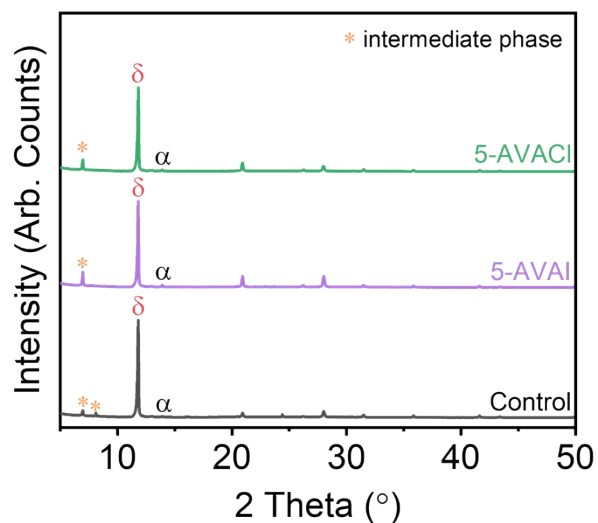

**Figure S5.** XRD patterns of the as-cast  $\text{FAPbI}_3$  films without additives and with 1 mol% 5-AVAI or 5-AVACl.

**Table S3.** Time-correlated single-photon counting lifetime measurements for  $\text{FAPbI}_3$  thin films with and without additives (at a concentration of 1 mol%).

|         | $A_1$ (%) | $\tau_1$ (ns) | $A_2$ (%) | $\tau_2$ (ns) |
|---------|-----------|---------------|-----------|---------------|
| None    | 45.11     | 33.38         | 54.89     | 108.53        |
| 5-AVAI  | 9.23      | 48.33         | 90.77     | 279.05        |
| 5-AVACl | 3.80      | 56.29         | 96.20     | 347.54        |

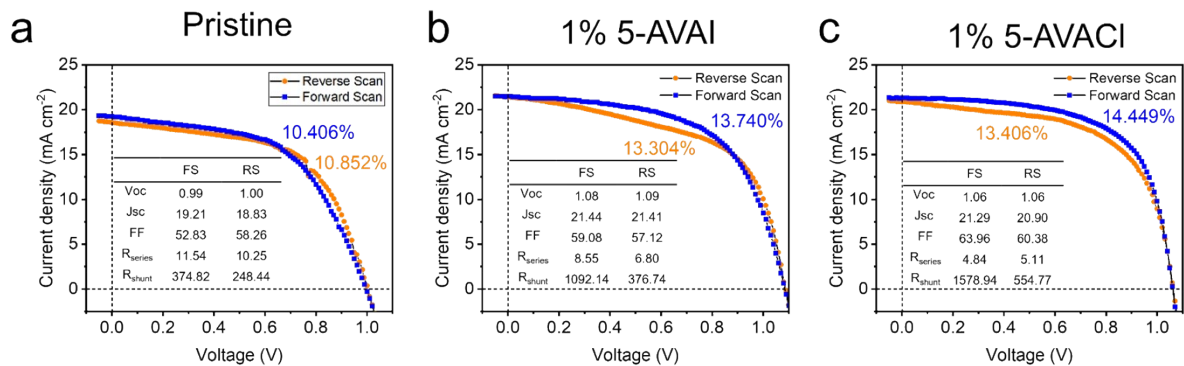

**Figure S6.** Forward and reverse J-V curves for the champion devices of (a) pristine FAPbI<sub>3</sub> and with 1 mol% of (b) 5-AVAI or (c) 5-AVACl.

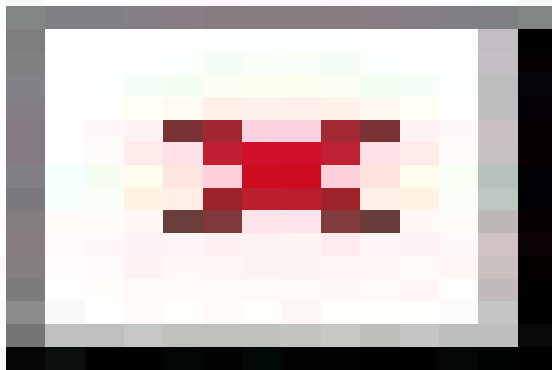

**Figure S7.** J-V curves for representative devices with 2–5 mol% of (a–c) 5-AVAI and (d–f) 5-AVACl.

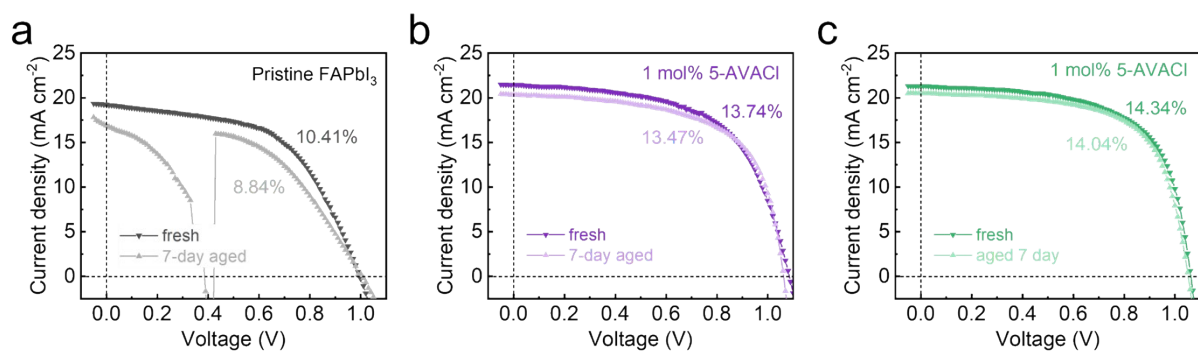

**Figure S8.** J-V curves (*forward scans*) of representative FAPbI<sub>3</sub> devices before and after 7 days of aging under ambient environment (15–20% relative humidity) at room temperature. Devices prepared with (a) pristine FAPbI<sub>3</sub> and with 1 mol% of (b) 5-AVAI and (c) 5-AVACl added.
